# Supplementary material
Source: PubMed Central journal article supplement (PMC4082765)
Supplement: NIHMS594706-supplement-1.pdf [file NIHMS594706-supplement-1.pdf]

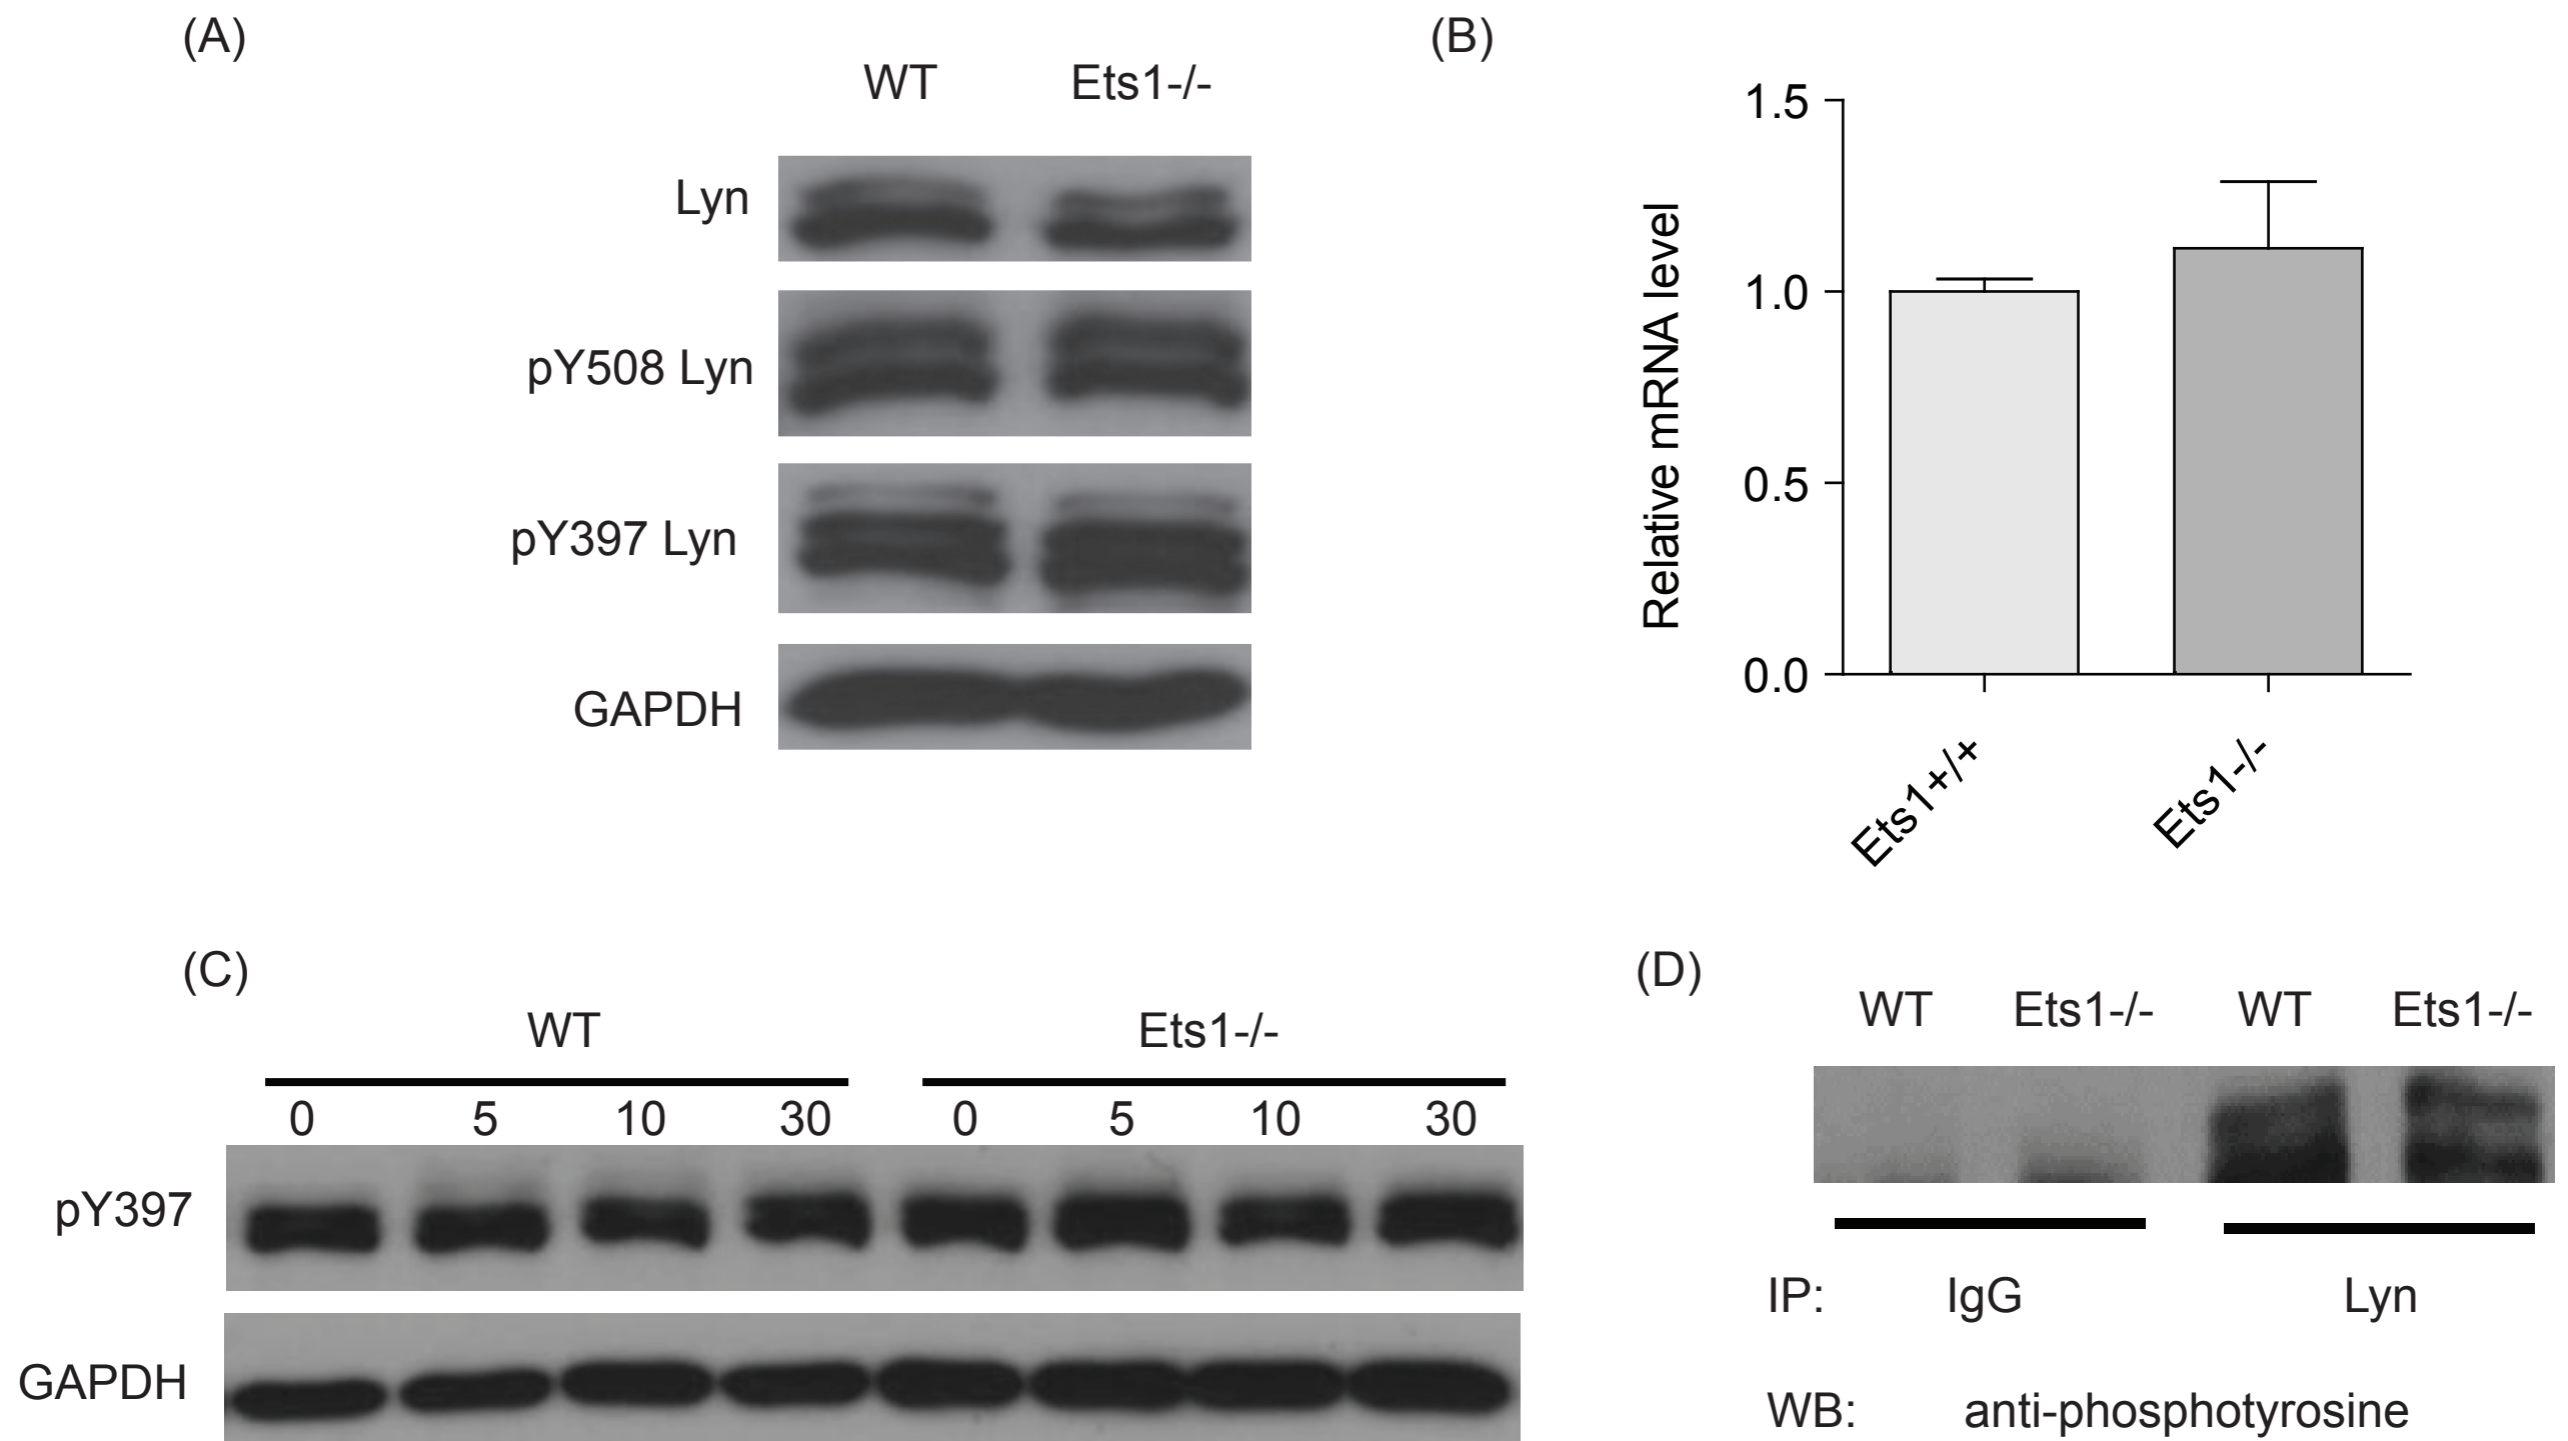

**Supplemental Figure 1:** Lyn expression and phosphorylation is not changed in Ets1-deficient B cells. (A) Western blot for Ets1 and GAPDH with B cell lysates from wild-type (WT) and Ets1 deficient mice. Each Western blot was done either 2 (Y397 Lyn) or 3 (total Lyn and Y508 Lyn) times with separate sets of wild-type and Ets1<sup>-/-</sup> mice. (B) RT-qPCR analysis of Lyn mRNA in B cells from wild-type and Ets1<sup>-/-</sup> mice (n=2 for each genotype). (C) Time-course of anti-IgM stimulation of wild-type (WT) or Ets1-deficient B cells followed by Western blotting for phospho-Y397 of Lyn. One of two similar experiments is shown. (D) Splenic B cells from wildtype (WT) or Ets1-deficient mice were immunoprecipitated with anti-Lyn antibody or control IgG, then Western blotted with an antibody against phosphotyrosine (4G10). One of two similar experiments is shown.
